# Supplementary material for: ADAR1 RNA editing enzyme regulates R-loop formation and genome stability at telomeres in cancer cells
Source: PubMed Central journal article supplement (PMC7955049; doi:10.1038/s41467-021-21921-x), 2021-03-12
Supplement: 41467_2021_21921_MOESM1_ESM.pdf [file 41467_2021_21921_MOESM1_ESM.pdf]

## **Supplementary Information**

### **ADAR1 RNA editing enzyme regulates R-loop formation and genome stability at telomeres in cancer cells**

**Yusuke Shiromoto\*, Masayuki Sakurai\*, Moeko Minakuchi\*, Kentaro Ariyoshi, and Kazuko Nishikura#**

The Wistar Institute, 3601 Spruce Street, Philadelphia, Pennsylvania 19104, USA

\*These authors contributed equally to this work.

Present Address: Masayuki Sakurai, Research Institute for Biomedical Sciences, Tokyo University of Science, Chiba 278-0022, Japan; Kentaro Ariyoshi, Integrated Center for Science and Humanities, Fukushima Medical University, Fukushima, 960-1295, Japan

#Correspondence: Kazuko Nishikura Tel: +1 215 898 3828; Fax: +1 215 898 3911;  
Email: [kazuko@wistar.org](mailto:kazuko@wistar.org)

#### **Inventory**

- Supplementary Figure 1-10
- Supplementary Data 1- 4
- Supplementary Movie 1-2

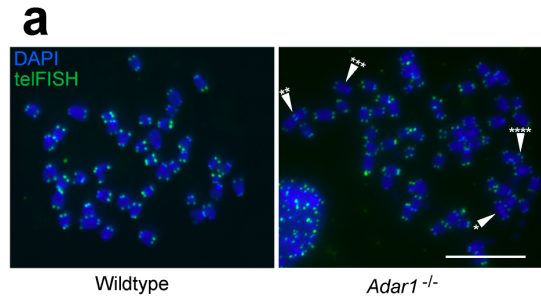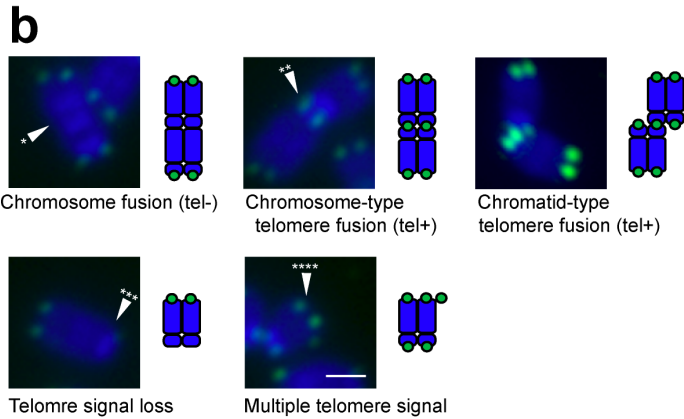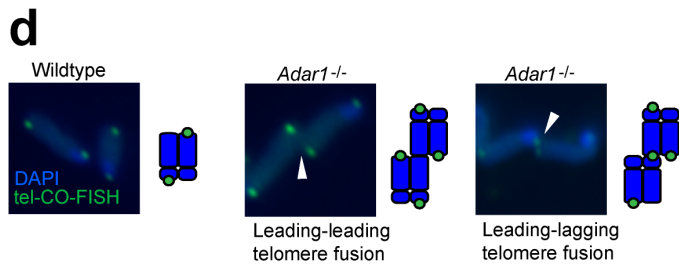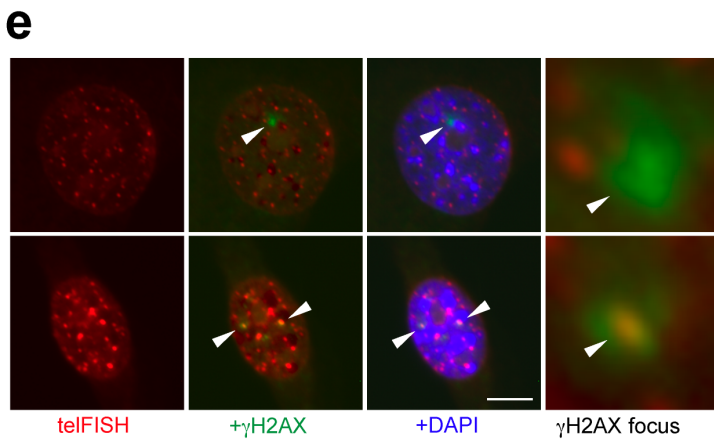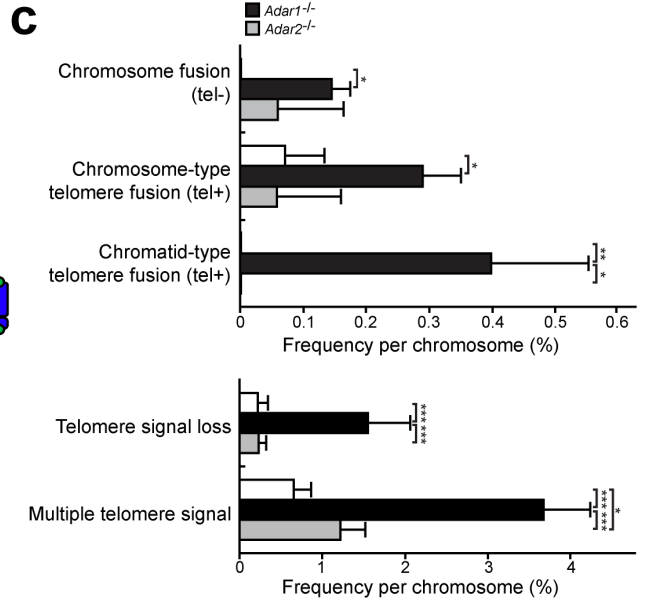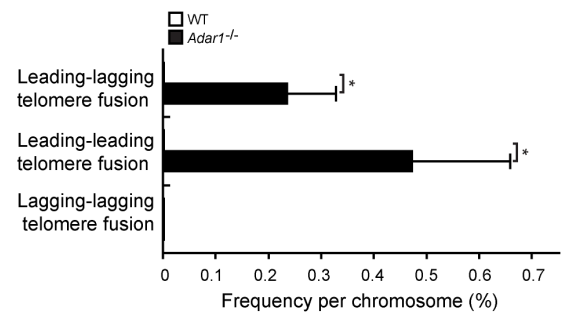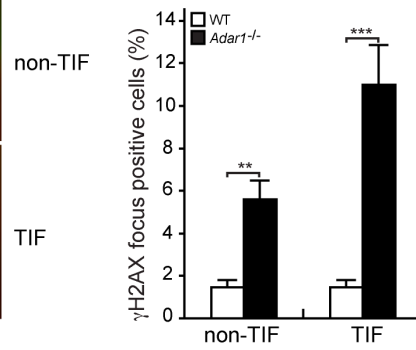

**Supplementary Fig. 1 | Telomere abnormality in *Adar1*<sup>-/-</sup> MEF cells.** **a**, Representative telomere FISH (green) images of metaphase spreads of wild type MEF cells (left) and *Adar1*<sup>-/-</sup> MEF cells (right) counterstained with DAPI. An arrowhead with ‘\*’ indicates chromosome fusion without a telomere signal (tel-), arrowhead with ‘\*\*’ indicates chromosome type telomere fusion (tel+), arrowhead with ‘\*\*\*’ indicates telomere signal loss, arrowhead with ‘\*\*\*\*’ indicates multiple telomere signal. Scale bars, 25  $\mu$ m. **b**, Magnified image of telomere abnormality in *Adar1*<sup>-/-</sup> MEF cells. Scale bars, 1  $\mu$ m. **c**, The frequency of telomere abnormality, chromosome fusion (tel-), chromosome-type telomere fusion (tel+), chromatid-type telomere fusion (tel+), telomere signal loss and multiple telomere signal in wildtype MEF cells, *Adar1*<sup>-/-</sup> MEF cells and *Adar2*<sup>-/-</sup> MEF cells. **d**, Telomere fusions detected in *Adar1*<sup>-/-</sup> MEF cells were further investigated by CO-FISH. Telomere lagging strands were visualized with a FITC-labeled telomeric (CCCTAA)<sub>4</sub> PNA probe (green), whereas leading strands remained unmarked. Representative chromosomes with various types of telomere abnormality are shown with schematic drawings. Telomere ends with lagging-lagging and leading-lagging telomere fusions were stained by the FITC probe (green), whereas telomere ends with no staining correspond to leading-leading telomere fusions. White arrow heads indicate the telomere fusion points shown in schematic drawings. **c**, **d**, Quantification of different types of telomere fusions detected: values are given as mean  $\pm$  standard error with significant differences by two-tailed Student’s t-test indicated \*,  $P < 0.05$  ( $n = 3$ , biological replicates). **e**, Immuno-FISH staining of telomeres (red),  $\gamma$ H2AX (green) counterstained with DAPI. Upper panels,  $\gamma$ H2AX focus (arrowhead) is not co-localized with the telomere signal (non-telomere induced foci: non-TIF) in the nucleus; lower panels,  $\gamma$ H2AX focus (arrowhead) is co-localized with telomere signal (telomere dysfunction induced foci: TIF) in the nucleus. The graph indicates the non-TIF positive cells and TIF positive cells in wild type MEF cells and *Adar1*<sup>-/-</sup> MEF cells. Values are mean  $\pm$  standard error ( $n = 3$ , biologically independent samples) with significant differences by two-tailed Student’s t-test indicated \*\*,  $P < 0.01$ , \*\*\*,  $P < 0.001$ . Scale bars, 10  $\mu$ m. **c-e**, All individual experimental data values and exact  $P$  values are presented in Source Data file.

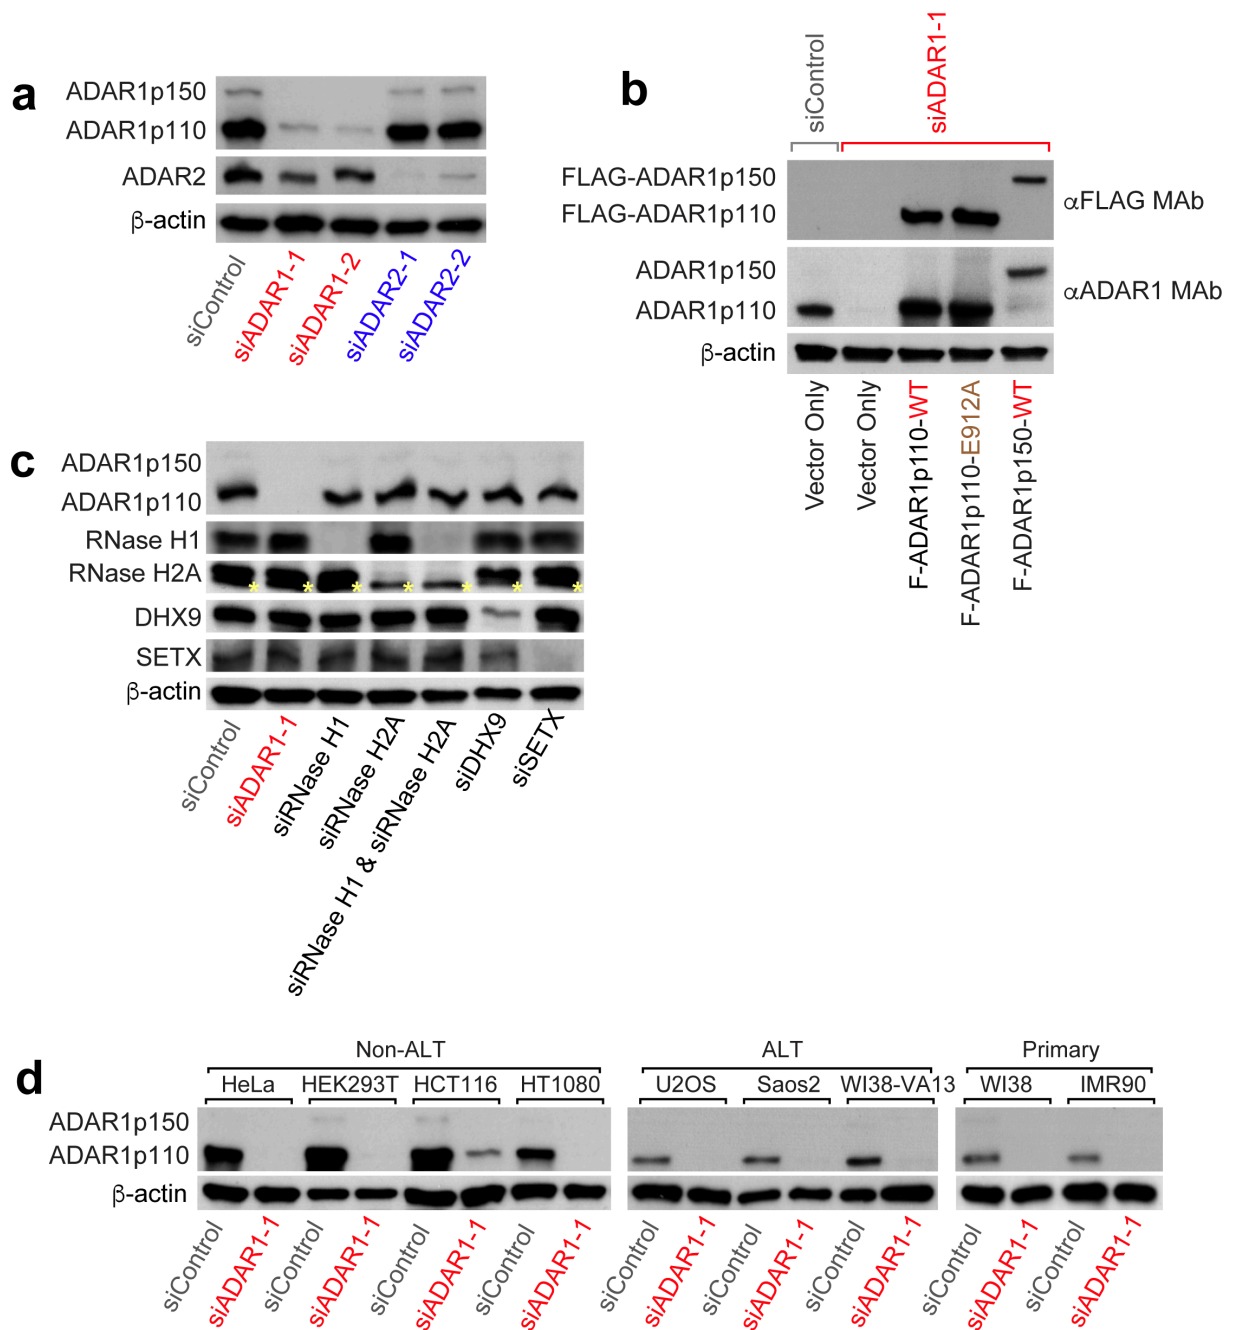

**Supplementary Fig. 2 | Validation of siRNA gene knockdown and confirmation of FLAG-ADAR1 expression levels.** **a**, ADAR1 and ADAR2 knockdown efficiency by each siRNA was confirmed by immunoblotting. β-actin was used as a loading control. **b**, Lentiviruses for empty vector control or ectopic expression of F-ADAR1p110-WT, F-ADAR1p110-E912A, or F-ADAR1p150-WT were infected in HeLa cells that had been transfected with synthetic siRNAs corresponding to the human ADAR1 mRNA 3'UTR sequence. The expression levels of exogenous FLAG-ADAR1 protein were examined by western blotting analysis using anti-FLAG M2 and anti-ADAR1 antibodies. **c**, R-loop regulator knockdown efficiency by each siRNA was confirmed by immunoblotting. β-actin was used as a loading control. Asterisks show nonspecific bands (RNase H2A panel). **d**, ADAR1 siRNA-mediated knockdown in each cell line was confirmed by immunoblotting. **a-d**, Protein molecular weight markers are presented in Source Data file.

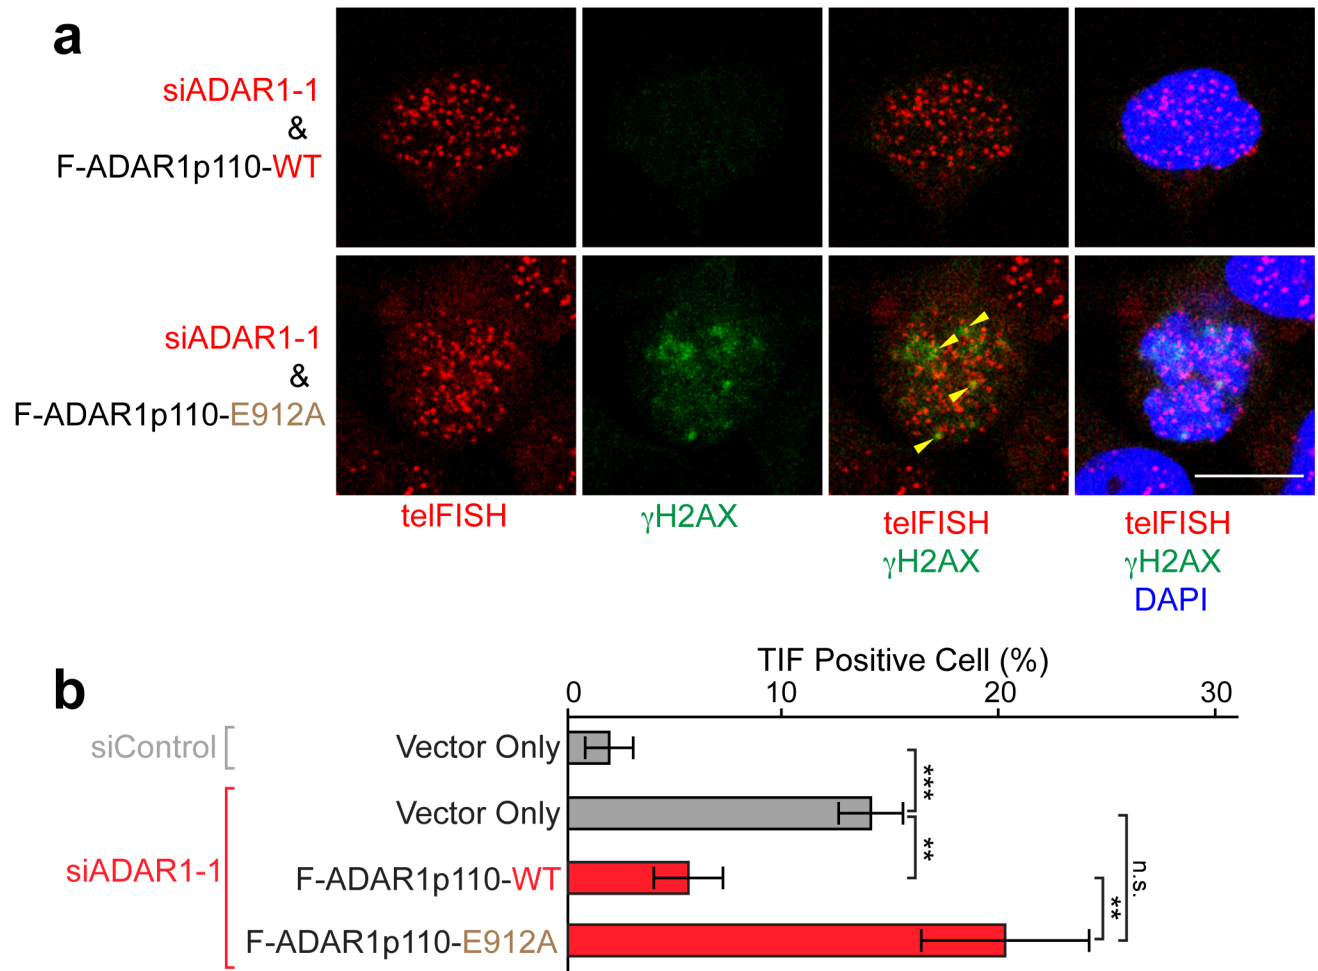

**Supplementary Fig. 3 | Ectopic expression of ADAR1p110-WT suppresses TIFs induced in ADAR1 depleted HeLa cells.** **a**, Representative Immuno-FISH images of ADAR1 depleted HeLa cells infected with FLAG-ADAR1p110-WT or FLAG-ADAR1p110-E912A mutant lentivirus are shown. Yellow arrowhead indicates TIF. Scale bar, 10  $\mu$ m. **b**, The frequency of TIFs was estimated by examining at least 200 individual control or ADAR1 depleted HeLa cells infected with empty vector, FLAG-ADAR1p110-WT, or FLAG-ADAR1p110-E912A lentivirus. TIFs induced in ADAR1 depleted HeLa cells were suppressed by FLAG-ADAR1p110-WT but not by ADAR1p110-E912A mutant nor by vector only. HeLa cells with one or more TIFs were counted as TIF positive cells. Values are given as mean  $\pm$  S.D. ( $n = 3$ , biologically independent samples) with significant differences by two-tailed Student's t-test indicated \*\*,  $P < 0.01$ , \*\*\*,  $P < 0.001$ , n.s., not significant. All individual experimental data values and exact  $P$  values are presented in Source Data file.

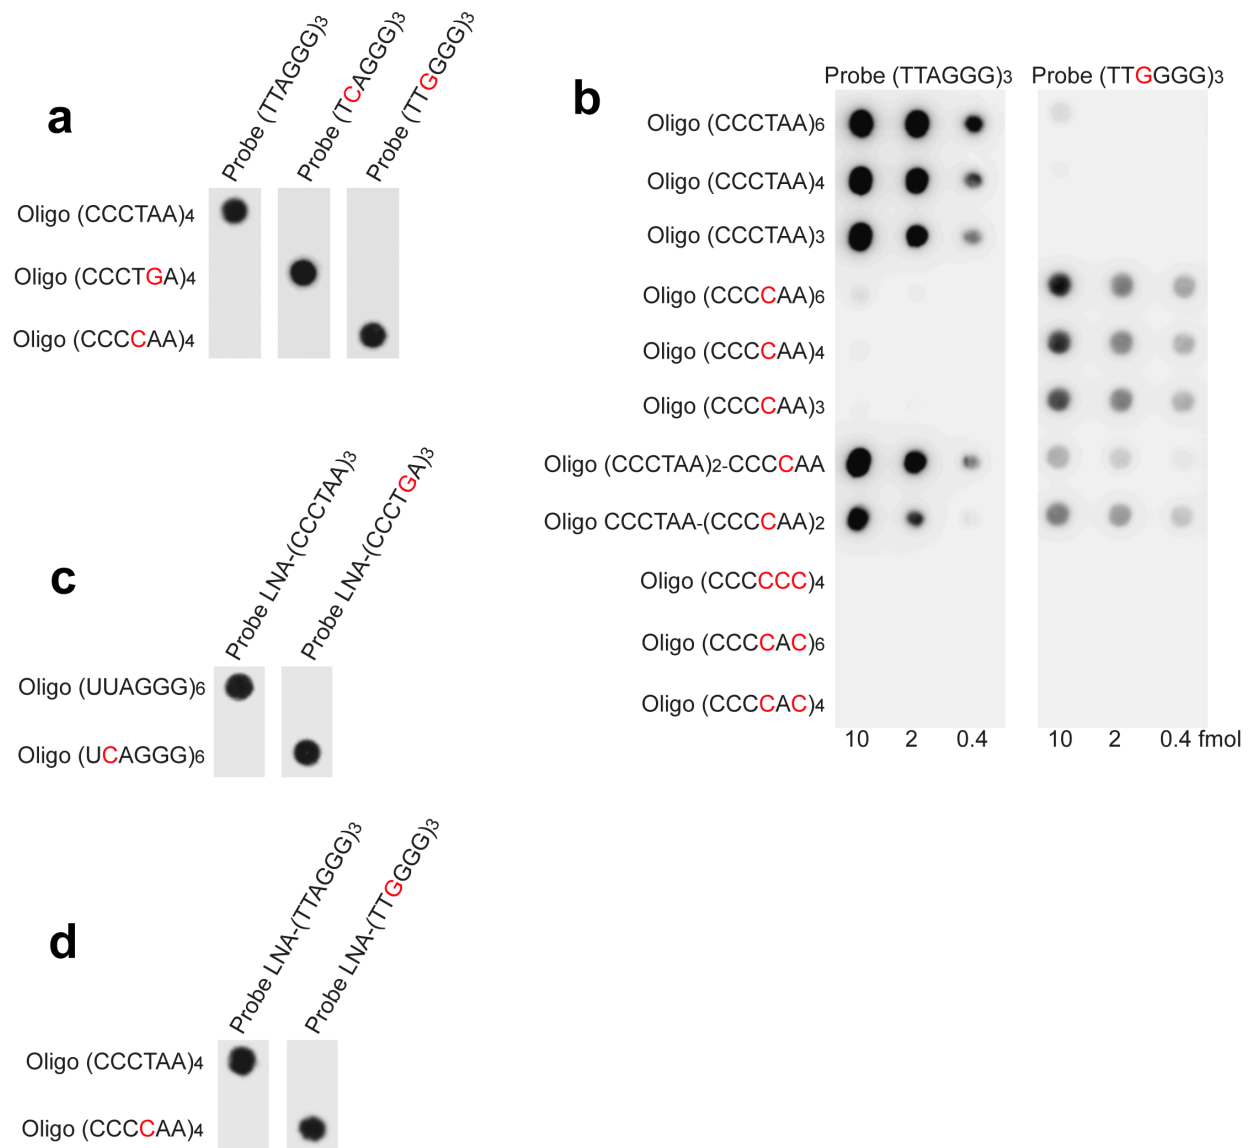

**Supplementary Fig. 4 | Validation of telomeric probe specificity.** **a**, Specific hybridization of telomeric probes was confirmed using control oligo DNAs. The canonical TTAGGG probes hybridized specifically to CCCTAA oligos but not to CCCTGA or CCC<sub>C</sub>AA oligos. TCAGGG and TTGGGG variant repeat probes also specifically bound to CCCTGA or CCC<sub>C</sub>AA oligos, respectively. **b**, Control oligo DNAs were quantitatively detected by the canonical TTAGGG and variant CCC<sub>C</sub>AA probes. The signals of TTAGGG probes against (CCCTAA)<sub>2</sub>-CCC<sub>C</sub>AA oligos were higher than those of CCCTAA-(CCC<sub>C</sub>AA)<sub>2</sub> oligos, whereas the TTGGGG probe signals of (CCCTAA)<sub>2</sub>-CCC<sub>C</sub>AA oligos were lower than those of CCCTAA-(CCC<sub>C</sub>AA)<sub>2</sub> oligos. (CCCC<sub>C</sub>)<sub>4</sub>, and (CCC<sub>C</sub>AC)<sub>6</sub> or (CCC<sub>C</sub>AC)<sub>4</sub> oligos were not detected by both TTAGGG canonical and TTGGGG variant probes. Specific hybridization of locked telomeric repeat probes was confirmed using control RNA (**c**) or DNA (**d**) oligos. **c**, The LNA canonical CCCTAA and variant CCCTGA probe hybridized specifically to UUAGGG and UCAGGG RNA oligos, respectively. **d**, The LNA canonical TTAGGG and variant TTGGGG probe hybridized specifically to CCCTAA and CCC<sub>C</sub>AA DNA oligos, respectively.

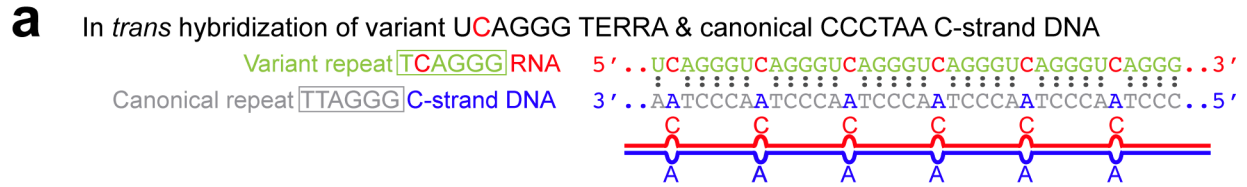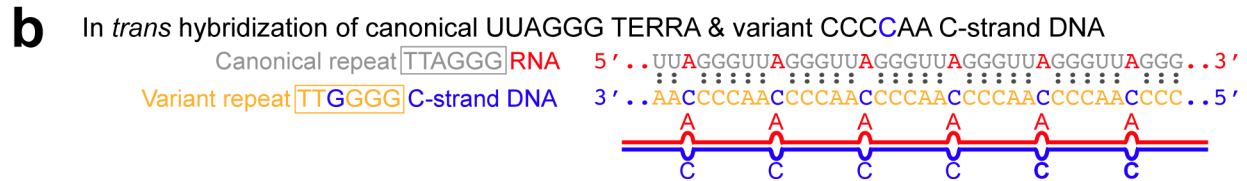

**Supplementary Fig. 5 | Formation of telomeric repeat RNA:DNA hybrids containing C-A and A-C mismatches by in *trans* hybridization.** **a**, In *trans* hybridization of TERRA RNAs derived from TCAGGG (UCAGGG) variant repeats (green) to the C-strand DNA containing TTAGGG (CCCTAA) canonical repeats (gray), or **b**, TERRA RNAs derived from TTAGGG (UUAGGG) canonical repeats (gray) to the C-strand DNA containing TTGGGG (CCCCAA) variant repeats (orange) results in formation of RNA:DNA hybrids containing C-A and A-C mismatches, respectively.

## ADAR1p110-EAA

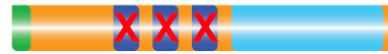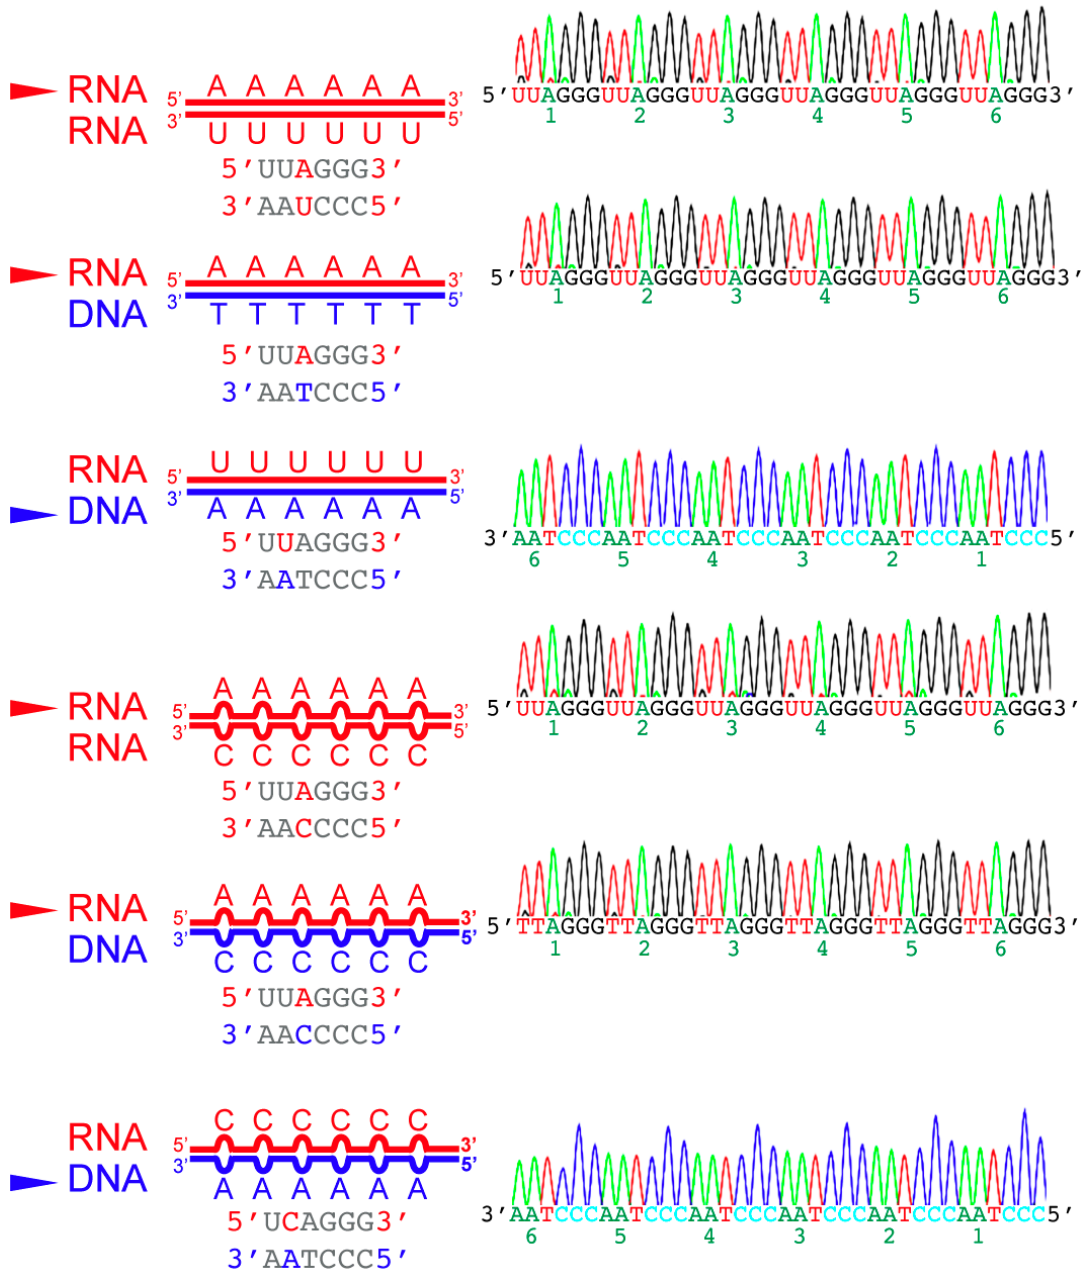

**Supplementary Fig. 6 | ADAR1 dsRNA binding domains are required for editing of RNA:DNA hybrids.** No editing of RNA:DNA hybrids detected with ADAR1p110-EAA dsRNA binding defective mutant. *In vitro* editing assay was conducted using HA-ADAR1p110-EAA. PCR products (RT-PCR amplified RNA strands and PCR amplified DNA strands) were subjected to Sanger sequencing. The strands analyzed by sequencing are indicated by red and blue arrowheads. ADAR1p110-EAA did not display any editing activity for any of the substrates tested.



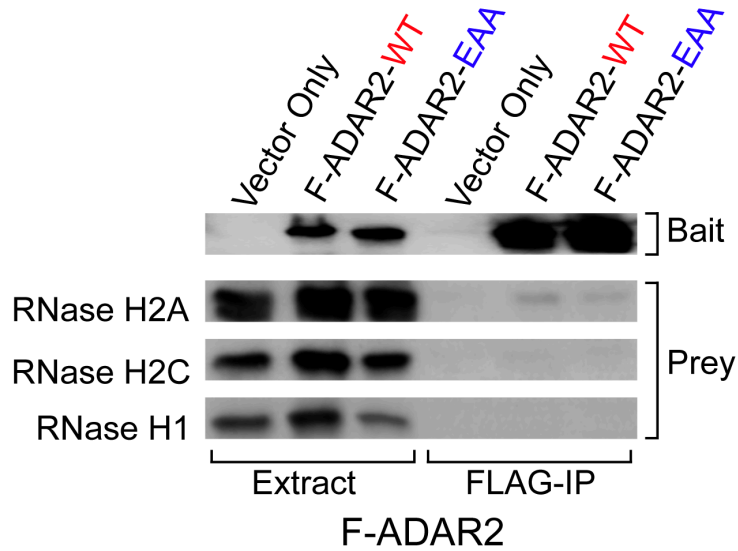

**Supplementary Fig. 7 | No interaction between ADAR2 and RNase H1 or RNase H2A and H2C subunits was detected.** FLAG-tagged ADAR2 (F-ADAR2-WT and F-ADAR2-EAA) recombinant proteins were purified from permanently transfected HEK293T cell extracts by anti-FLAG M2 magnetic beads. RNase H2 subunits 2A and 2C or RNase H1 were not pulled down with either F-ADAR2-WT or F-ADAR2-EAA. Protein molecular weight markers are presented in Source Data file.



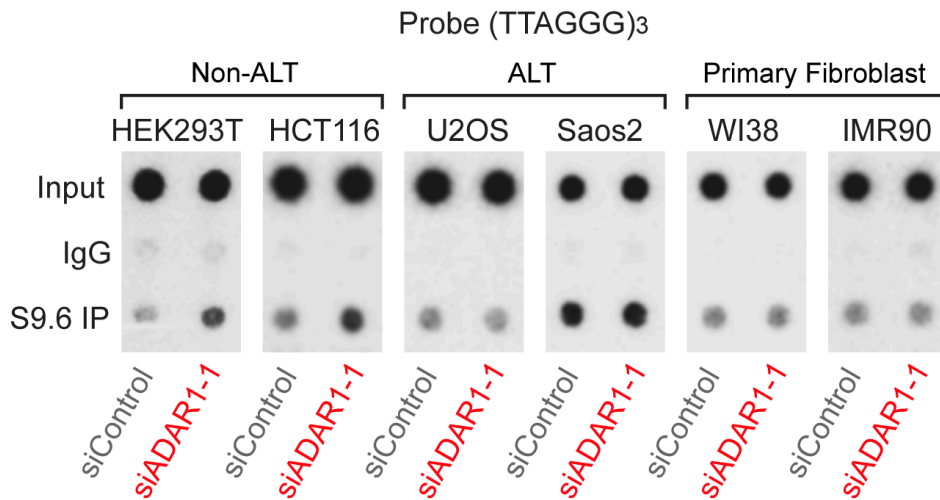

**Supplementary Fig. 9** | Detection of RNA:DNA hybrids containing telomeric repeats in ADAR1 depleted non-ALT, ALT, and primary fibroblast cells. DRIP products were examined for C-strand DNAs of telomeric canonical TTAGGG (CCCTAA) repeats by dot blot analysis using an oligonucleotide probe capable of distinguishing a single-nucleotide mismatch (Supplementary Fig. 3a). Two additional similar dot blot analyses were carried out (Source Data file).

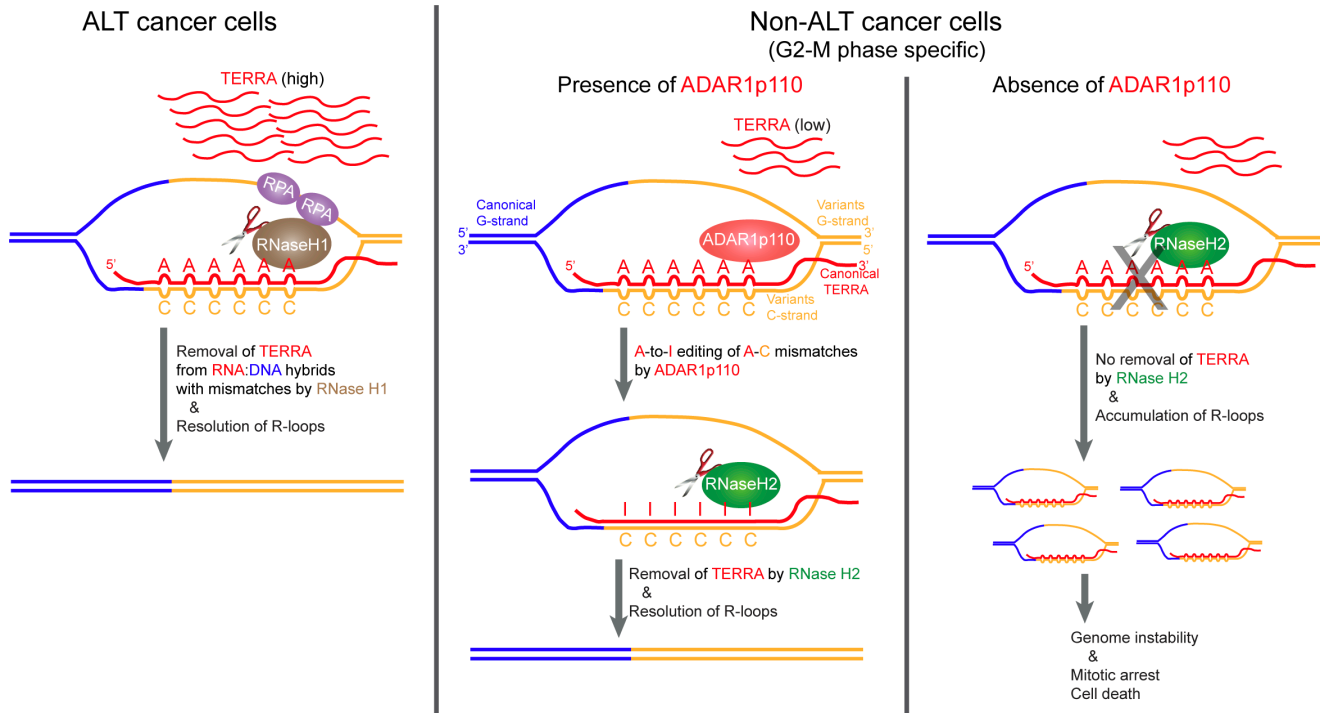

**Supplementary Fig. 10 | ADAR1 together with RNase H2 resolves telomeric R-loops in non-ALT cancer cells by editing A-C mismatches of RNA:DNA hybrids formed between canonical and variant repeats.** Telomeric variant repeats, wide spread in both ALT and non-ALT cancer cells, cause formation of RNA:DNA hybrids containing A-C mismatches. Unlike RNase H1, RNase H2 cannot degrade the RNA strands of these mismatch-containing RNA:DNA hybrids. Recruitment of RNase H1, perhaps guided by RPA protein bound to single-stranded G-strand DNAs<sup>40</sup>, and efficient resolution of telomeric R-loops by RNase H1 have been reported in ALT cells<sup>52</sup>. Close and specific interaction of ADAR1p110 with RNase H2, but not RNase H1, is detected only in non-ALT cells. In non-ALT cells, upregulated ADAR1p110 edits these A-C mismatches to I:C matched base pairs, which is essential for removal of the RNA strands by RNase H2. The cell cycle specific (G2-M) function of RNase H2 has been recently reported<sup>57</sup>. Thus, the R-loop regulatory function of ADAR1p110 may be exerted during G2-M phase. In the absence of ADAR1p110, non-ALT cancer cells die due to genome instability caused by accumulation of telomeric R-loops and mitotic arrest.

## **Supplementary Data**

**Supplementary Data 1. DNA and RNA oligos used in this study.**

**Supplementary Data 2. Data source and statistical analysis for *in vitro* editing assay.**

**Supplementary Data 3. Data source and statistical analysis for DNA:RNA hybrid cleavage assay.**

**Supplementary Data 4. Antibodies used in this study.**

## **Supplementary Movies**

**Supplementary Movie 1. Time-lapse movie of control knockdown HeLa cells.** HeLa cells were treated with CellLight Tubulin-GFP and SiR-DNA reagent. Time-laps images were obtained between 48-72 hrs after control siRNA transfection. Scan field is 200 x 200  $\mu\text{m}$ .

**Supplementary Movie 2. Time-lapse movie of ADAR1 knockdown HeLa cells.** HeLa cells were treated with CellLight Tubulin-GFP and SiR-DNA reagent. Time-laps images were obtained between 48-72 hrs after ADAR1 siRNA transfection. Scan field is 200 x 200  $\mu\text{m}$ .
